## Correction

# Correction: Alien Plant Monitoring with Ultralight Airborne Imaging Spectroscopy

The PLOS ONE Staff

There is an error in Figure 5, “*Carpobrotus* aff. *edulis* detection.” Please see the corrected Figure 5 here.

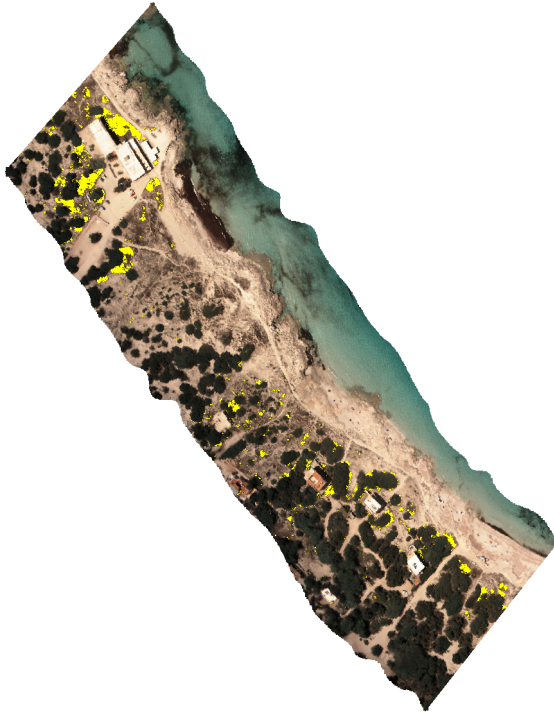

**Figure 5. *Carpobrotus* aff. *edulis* detection.** Classified image showing detection of *C. aff. edulis* highlighted in yellow (Formentera, Balearic Islands, 38°43'52''N, 1°26'50''E). True colour view of a hyperspectral image by the authors.  
doi:10.1371/journal.pone.0102381.g005

## Reference

1. Calviño-Cancela M, Méndez-Rial R, Reguera-Salgado J, Martín-Herrero J (2014) Alien Plant Monitoring with Ultralight Airborne Imaging Spectroscopy. PLoS ONE 9(7): e102381. doi:10.1371/journal.pone.0102381

**Citation:** The PLOS ONE Staff (2014) Correction: Alien Plant Monitoring with Ultralight Airborne Imaging Spectroscopy. PLoS ONE 9(10): e112031. doi:10.1371/journal.pone.0112031

**Published:** October 22, 2014

**Copyright:** © 2014 The PLOS ONE Staff. This is an open-access article distributed under the terms of the Creative Commons Attribution License, which permits unrestricted use, distribution, and reproduction in any medium, provided the original author and source are credited.
